# Supplementary material for: Effects of a Combination of Polynucleotide and Hyaluronic Acid for Treating Osteoarthritis
Source: MDPI journal article supplement (doi:10.3390/ijms25031714), 2024-01-30
Supplement: s1 [file s1]

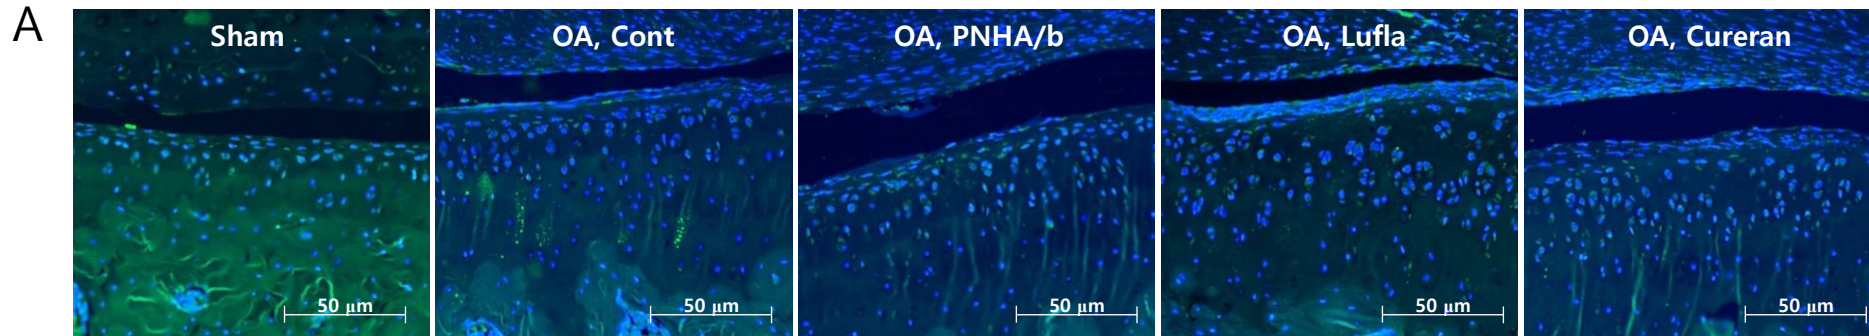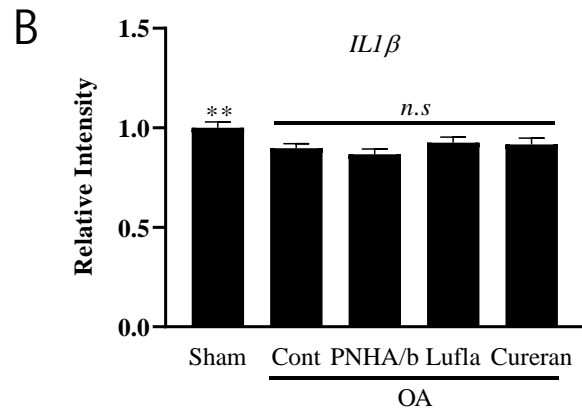

**Supplementary Figure S2.**

(A) IL1 $\beta$  immunofluorescence staining in medial joint cartilage. (B) Quantification of IL1 $\beta$  staining amount in articular cartilage.  $n = 8 - 13$  per group. Sham, sham operation; OA, osteoarthritis; Cont, control vehicle; PNHA/b, polynucleotide (2%) with hyaluronic acid (1%); Lufla, Hyaluronic acid (1%); Cureran, polynucleotide (2%). Relative to OA control: \*\* $p < 0.01$ , (unpaired t-test). n.s, not significant. The data are expressed as the mean  $\pm$  SEM.
