# Supplementary material for: Effects of a Combination of Polynucleotide and Hyaluronic Acid for Treating Osteoarthritis
Source: MDPI journal article supplement (doi:10.3390/ijms25031714), 2024-01-30
Supplement: s1 [file s1]

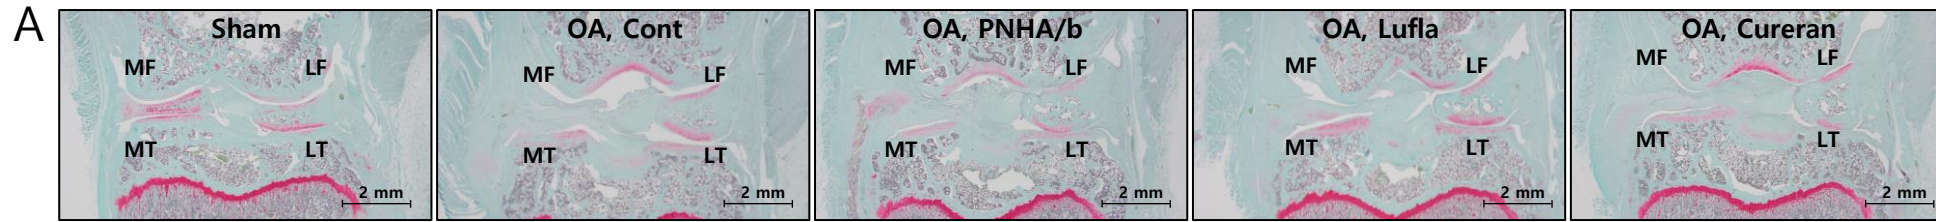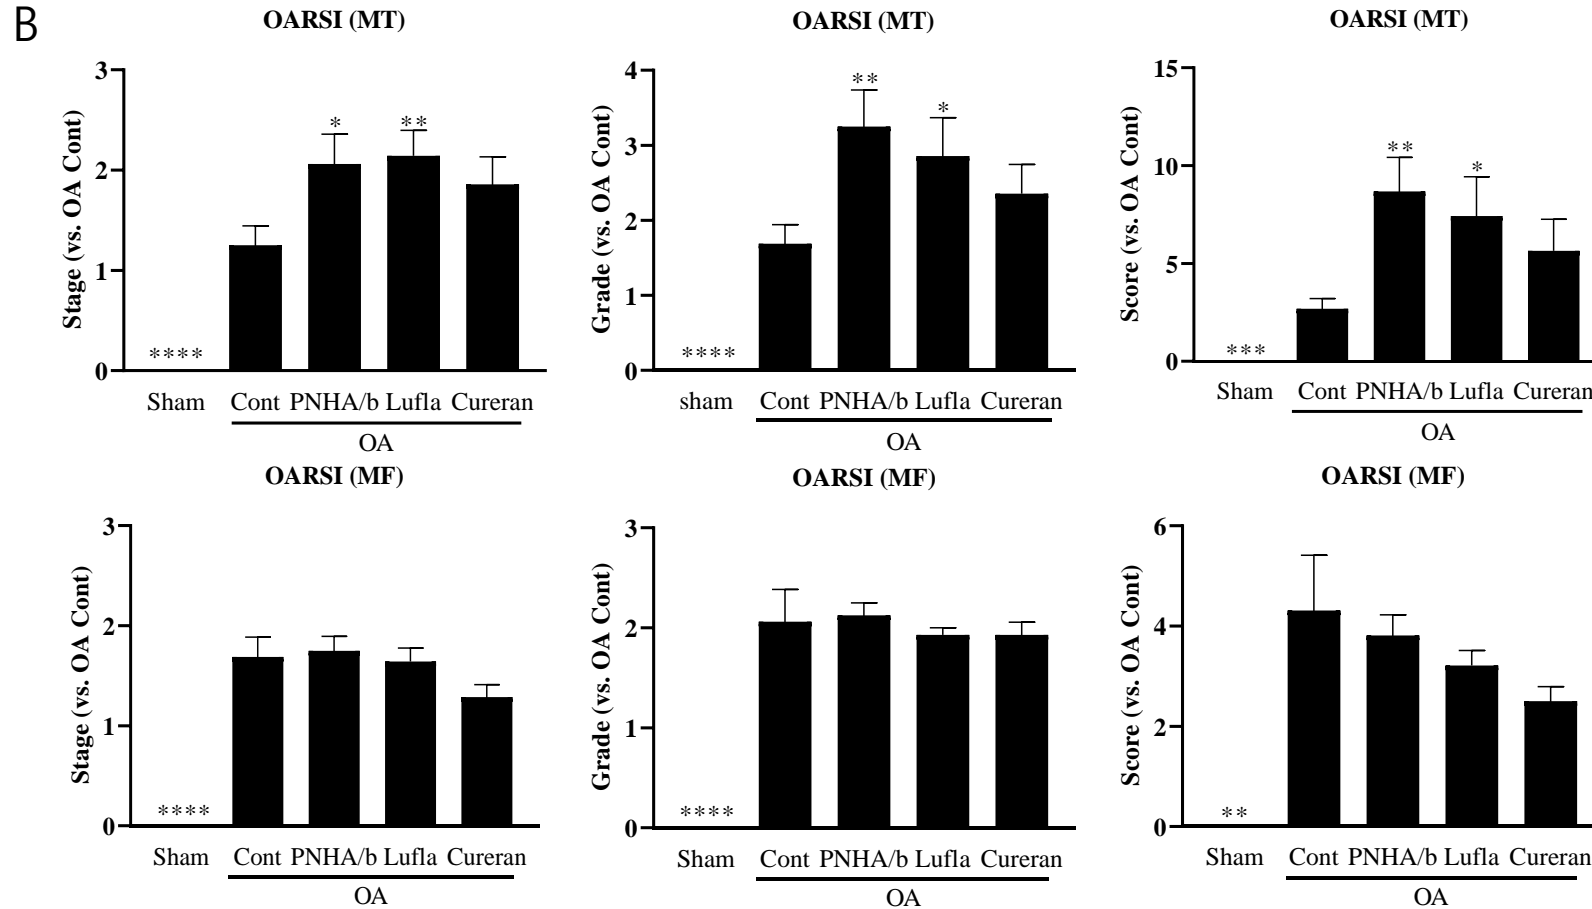

**Supplementary Figure S1.**

(A) Safranin O-Fast Green Staining. (B) OARSIS score and grade in tibia and femur. n = 10 – 12 per group. Sham, sham operation; OA, osteoarthritis; Cont, control vehicle; PNHA/b, polynucleotide (2%) with hyaluronic acid (0.5%); HA, hyaluronic acid (0.5%). Relative to OA control: \*p < 0.05, \*\*p < 0.01, \*\*\*p < 0.0001 (unpaired t-test). The data are expressed as the mean ± SEM.
